# Supplementary material for: Quantum cutting in nanoparticles producing two green photons
Source: Royal Society of Chemistry journal article supplement (doi:10.1039/c4cc04400b), 2014-01-01
Supplement: c4cc04400b1.pdf [file c4cc04400b1.pdf]

## Supporting Information

# Quantum cutting in nanoparticles producing two green photons

Chantal Lorbeer <sup>a</sup> and Anja-Verena Mudring <sup>a,b\*</sup>

<sup>a</sup> Inorganic Chemistry III- Materials Engineering and Characterization, Ruhr-Universität Bochum, Universitätsstr. 150, 44801 Bochum, Germany. E-mail: [anja.mudring@rub.de](mailto:anja.mudring@rub.de)

<sup>b</sup> Department of Materials Science and Engineering, Iowa State University and Critical Materials Institute, Ames Laboratory (DOE), Ames, IA 50010, USA. E-mail: [mudring@iastate.edu](mailto:mudring@iastate.edu).

### Experimental details

**Nanoparticle synthesis.** In a typical synthesis, the desired amounts (and in case of doping the desired molar ratios) of lanthanide acetate hydrates and sodium acetate were added to 6 ml of a 1-butyl-3-methylimidazolium tetrafluoroborate and stirred for 2 h in a glovebox until a homogenous suspension was obtained. The reaction mixture was then heated in the microwave (CEM Discover with a frequency of 2455 MHz) for 5 min at 60 °C (in order to facilitate the dissolving process), followed by heating at 200 °C for further 5 min. The power was limited to 300W in order to avoid overheating. The obtained colloidal solution was centrifuged (2000 rpm) and washed several times with 5 ml of a 1:1 volumetric mixture of dichloromethane and ethanol. Finally, the obtained powder was dried at 70 °C for 48 h.

**Powder X-ray diffraction.** PXRD measurements were performed by using a G670 diffractometer operating with MoK $\alpha$  radiation and equipped with an image plate-detector (Huber, Rimsting, Germany). The powders were sealed in 0.5 mm Lindemann capillaries under argon.

**Transmission electron microscopy.** Electron micrographs were obtained on a Tecnai G20 HRTEM transmission electron microscope (Fei, Hillsboro, USA). An acceleration voltage of 200 kV was applied. For sample preparation, a small amount of the sample was dispersed in ethanol and dropped on the TEM-Grid (Mesh 300, Plano<sup>®</sup>, Wetzlar, Germany).

**Luminescence measurements.** Luminescence measurements were conducted by using a Fluorolog FL 3-22 spectrophotometer (Horiba JobinYvon, Unterhachingen, Germany) equipped with a continuous xenon lamp for steady-state measurements and a pulsed xenon lamp for obtaining decay curves. Double gratings for the excitation and emission spectrometer were used as monochromators. The signal was detected by using a photomultiplier. For the measurements, powdered samples were filled in silica tubes and carefully positioned in the incoming beam in the sample chamber.

**Synchrotron radiation measurements.** VUV spectroscopic measurements with synchrotron radiation were undertaken on beamline I (SUPERLUMI station) at the Hamburger Synchrotronstrahlungslabor (HASYLAB), Deutsches Elektronensynchrotron (DESY), Germany. For more information see [http://hasylab.desy.de/facilities/doris\\_iii/beamlines/e6259/index\\_eng.html](http://hasylab.desy.de/facilities/doris_iii/beamlines/e6259/index_eng.html).

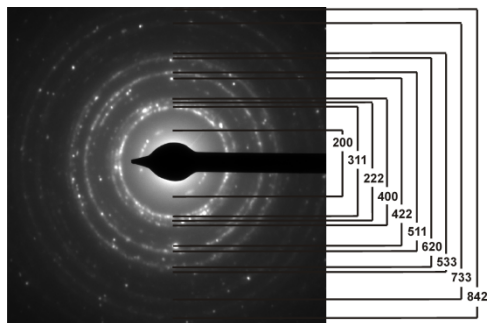

**SI-Figure 1.** Electron diffraction pattern of synthesized  $\text{NaGdF}_4$ : Er 1.5 %, Tb 0.3 % particles (ErTb<sub>2</sub>).
